# Supplementary material for: Flexible CuS-embedded human serum albumin hollow nanocapsules with peroxidase-like activity for synergistic sonodynamic and photothermal cancer therapy
Source: Royal Society of Chemistry journal article supplement (doi:10.1039/d2nr00258b), 2022-01-01
Supplement: d2nr00258b1.pdf [file d2nr00258b1.pdf]

Supporting information

## Flexible CuS-Embedded Human Serum Albumin Hollow Nanocapsules with Peroxidase-Like Activity for Synergistic Sonodynamic and Photothermal Cancer Therapy

Haijiao Wang,<sup>a</sup> Jun Tao,<sup>b</sup> Chaoli Xu,<sup>\*c,d</sup> Ying Tian,<sup>c</sup> Guangming Lu,<sup>\*f</sup> Bin Yang,<sup>\*c</sup> Zhaogang Teng,<sup>\*b</sup>

Supplementary Figures

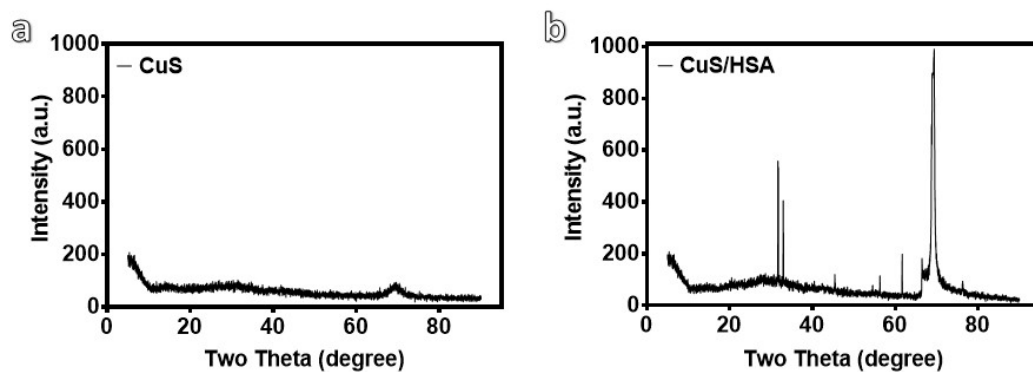

Fig. S1 XRD analysis of the (a) CuS and (b) CuS/HSA hollow nanocapsules.

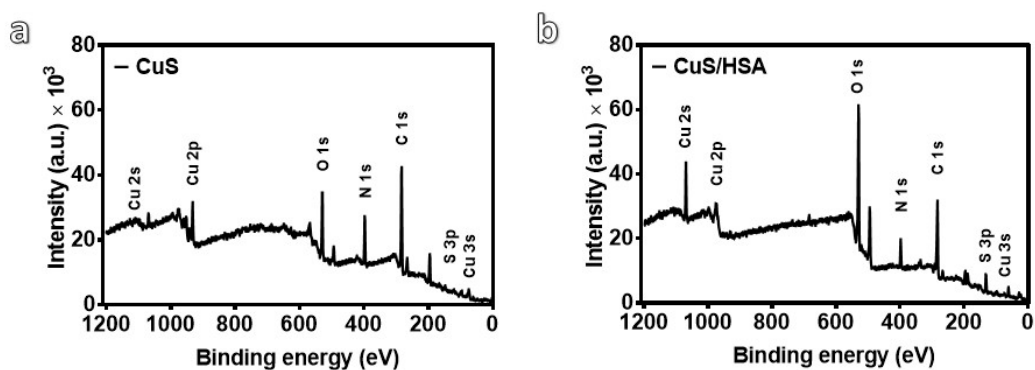

Fig. S2 XPS analysis of the (a) CuS and (b) CuS/HSA hollow nanocapsules.

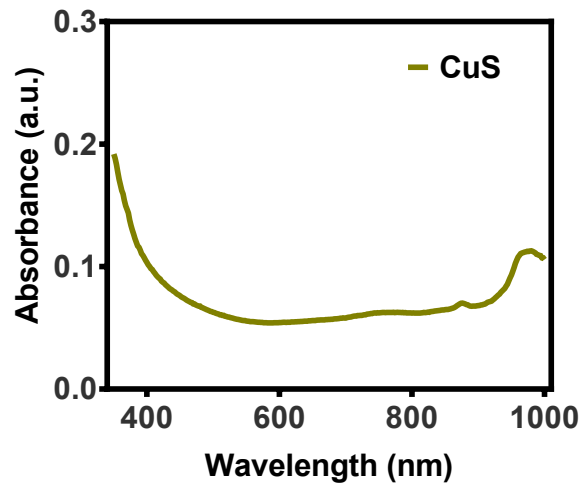

Fig. S3 The UV-spectra of the CuS nanoparticles.

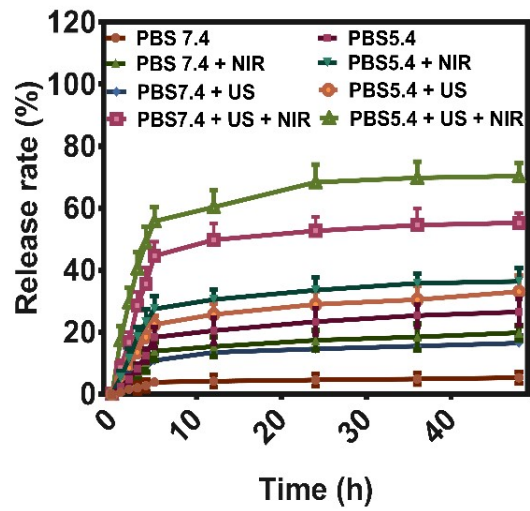

Fig. S4 The release rate of TAPP from CuS/HSA-TAPP hollow nanocapsules.

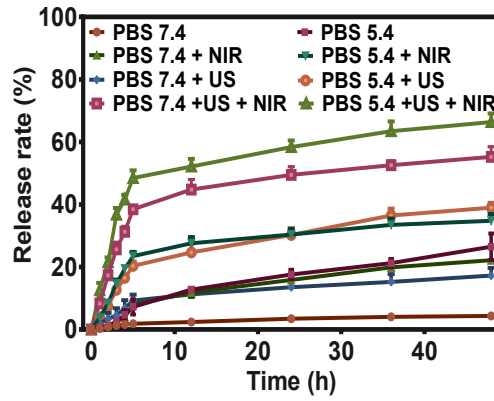

Fig. S5 The release rate of CuS from CuS/HSA-TAPP hollow nanocapsules.

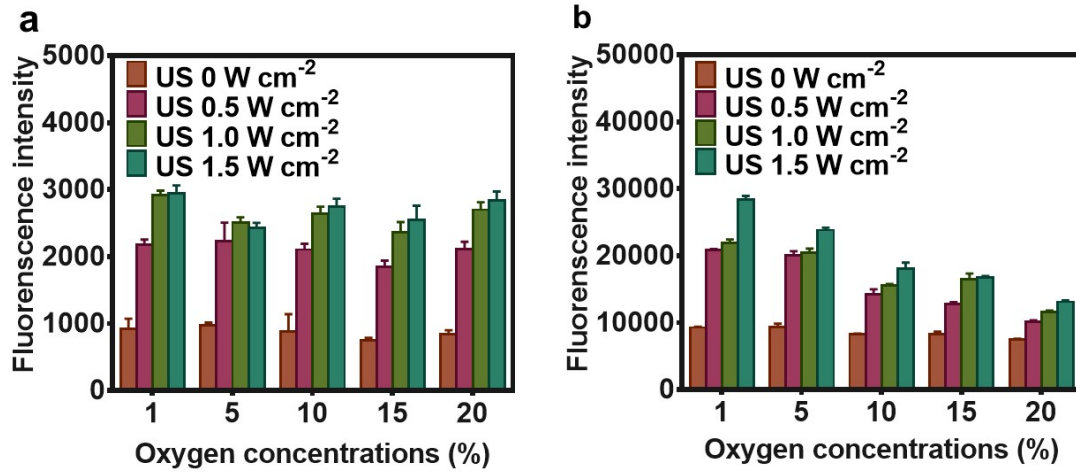

Fig. S6 The fluorescence intensities of ROS. (a) The fluorescence intensities of ROS of CuS/HSA-TAPP hollow nanocapsules in the presence of H<sub>2</sub>O<sub>2</sub> and varied concentrations of oxygen (20%, 15%, 10%, 5%, and 1%) under US irradiation. (b) The fluorescence intensities of ROS of CuS/HSA-TAPP hollow nanocapsules in MCF-7 cells incubated with varied concentrations of oxygen (20%, 15%, 10%, 5%, and 1%) under US irradiation.

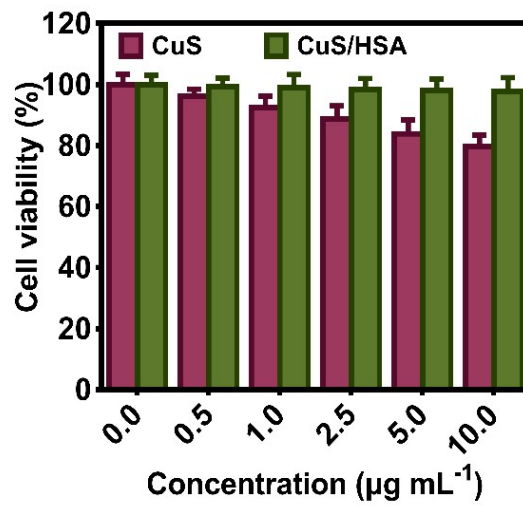

**Fig. S7** The cell viability of CuS nanoparticles and CuS/HSA hollow nanocapsules.

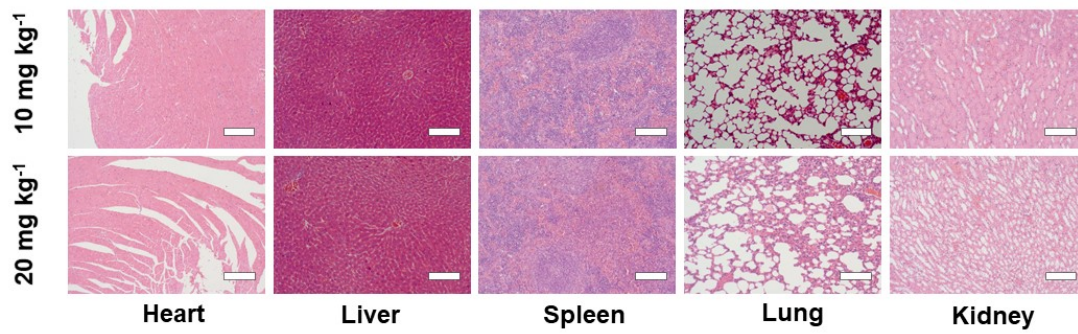

**Fig. S8** The in vivo biocompatibility of the CuS/HSA hollow nanocapsules in the mice. The H&E staining of major organs of the mice injected with 10 and 20 mg kg<sup>-1</sup> CuS/HSA hollow nanocapsules. Scale bars, 100 µm.

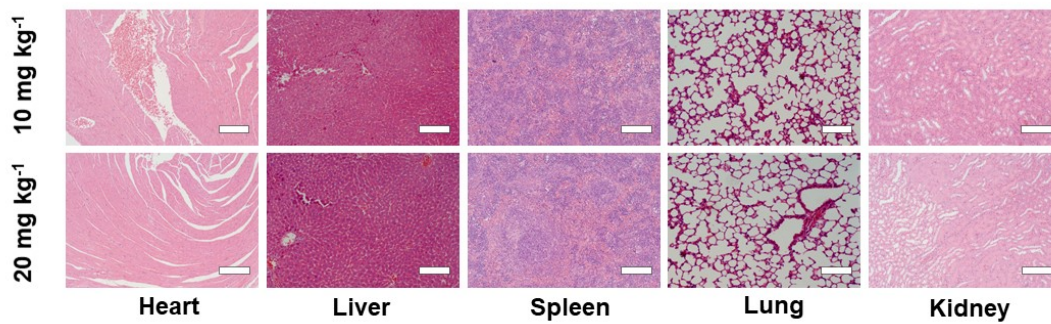

**Fig. S9** The in vivo biocompatibility of the CuS/HSA-TAPP hollow nanocapsules in the mice. The H&E staining of major organs of the mice injected with 10 and 20 mg kg<sup>-1</sup> CuS/HSA-TAPP hollow nanocapsules. Scale bars, 100 μm.

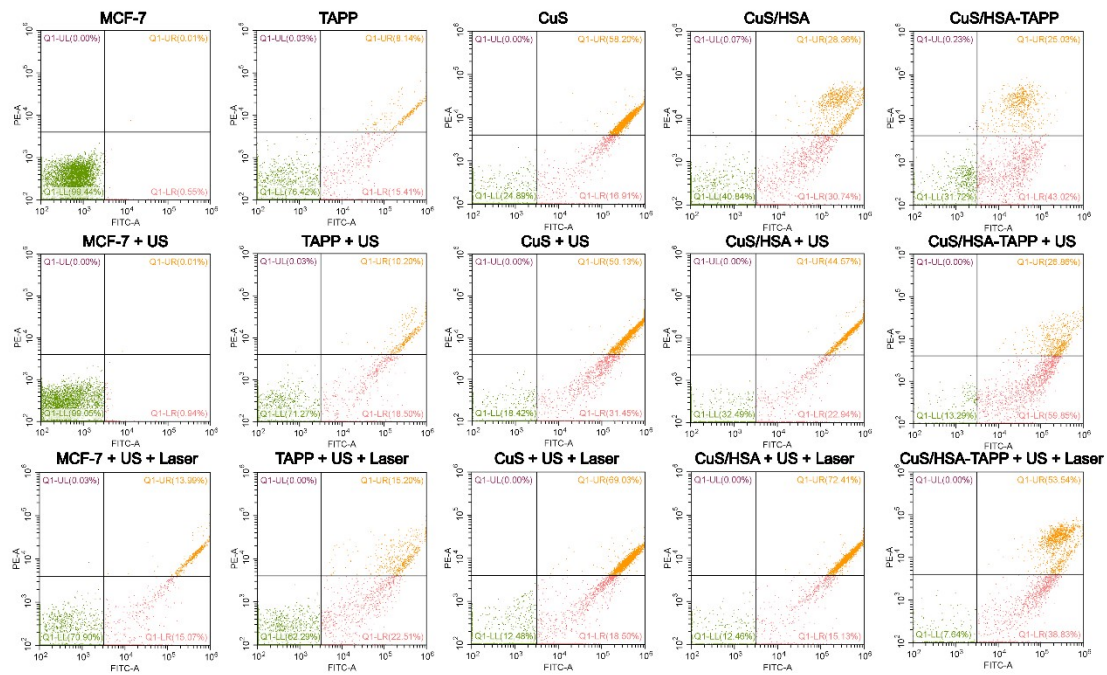

**Fig. S10** Flow cytometry images of MCF-7 cells apoptosis induced by CuS, TAPP, CuS/HSA, and CuS/HSA-TAPP with or without US or laser irradiation.

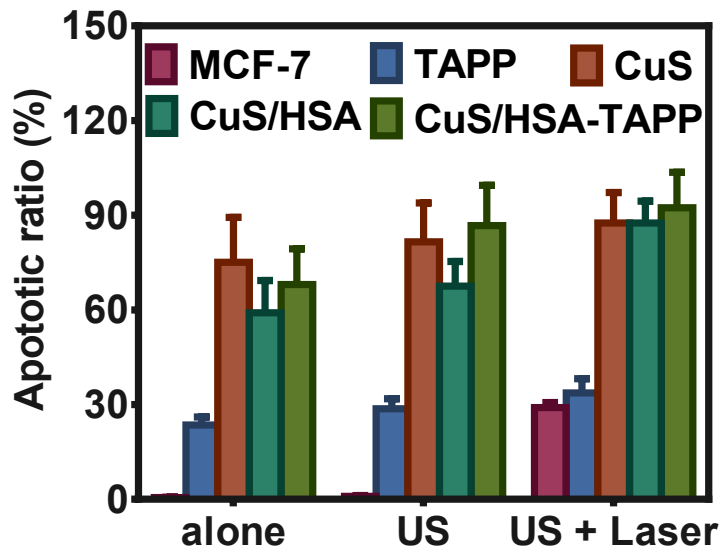

Fig. S11 Histogram of apoptosis percent in MCF-7 cells with different materials.

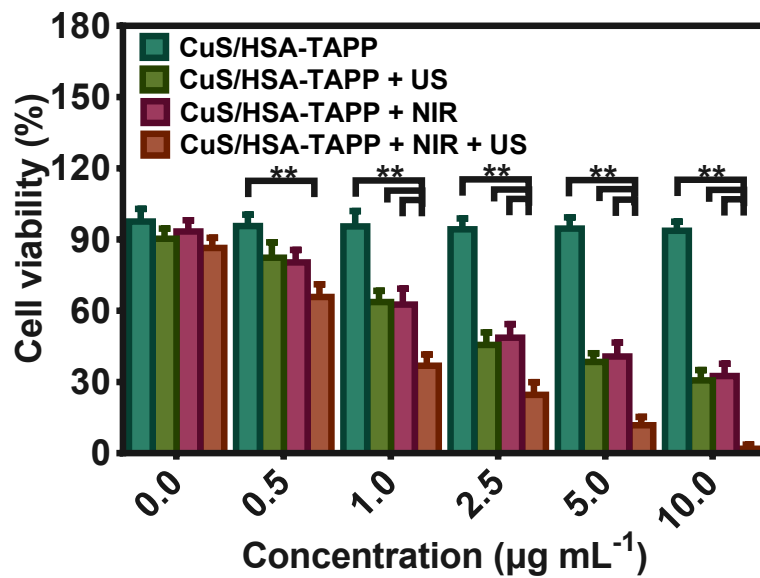

Fig. S12 Cell viabilities of MCF-7 incubated with CuS/HSA-TAPP hollow nanocapsules for combined SDT and PPT. Cell viability of the CuS/HSA-TAPP hollow nanocapsules alone, CuS/HSA-TAPP hollow nanocapsules + US (1 W  $\text{cm}^{-2}$ , 2 min), CuS/HSA-TAPP hollow nanocapsules + NIR (2 W  $\text{cm}^{-2}$ , 5 min), CuS/HSA-TAPP hollow nanocapsules + NIR (2 W  $\text{cm}^{-2}$ , 5 min) + US (1 W  $\text{cm}^{-2}$ , 2 min) groups. (\*\*P < 0.05).
